# Supplementary material
Source: publisher figshare collection journal article supplement (https://acs.figshare.com/ndownloader/files/4303783)
Supplement: Supplementary file 1 [file 4303783]

## Supporting Information

Model Random Polyampholytes from Nonpolar Methacrylic Esters

Baljinder Kaur,<sup>1</sup> Larissa D'Souza,<sup>1</sup> Lisa A. Slater,<sup>2</sup> Thomas H. Mourey,<sup>2</sup> Siwei Liang,<sup>3</sup> Ralph H. Colby,<sup>3</sup> Warren T. Ford<sup>1</sup>

<sup>1</sup>Department of Chemistry, Oklahoma State University, Stillwater, OK 74078

<sup>2</sup>Eastman Kodak Company, Corporate Research and Engineering, 1999 Lake Avenue, Rochester, NY 14650-2136

<sup>3</sup>Department of Materials Science and Engineering, Pennsylvania State University, University Park, PA 16802

Correspondence to W. T. Ford (E-mail: [warren.ford@okstate.edu](mailto:warren.ford@okstate.edu))

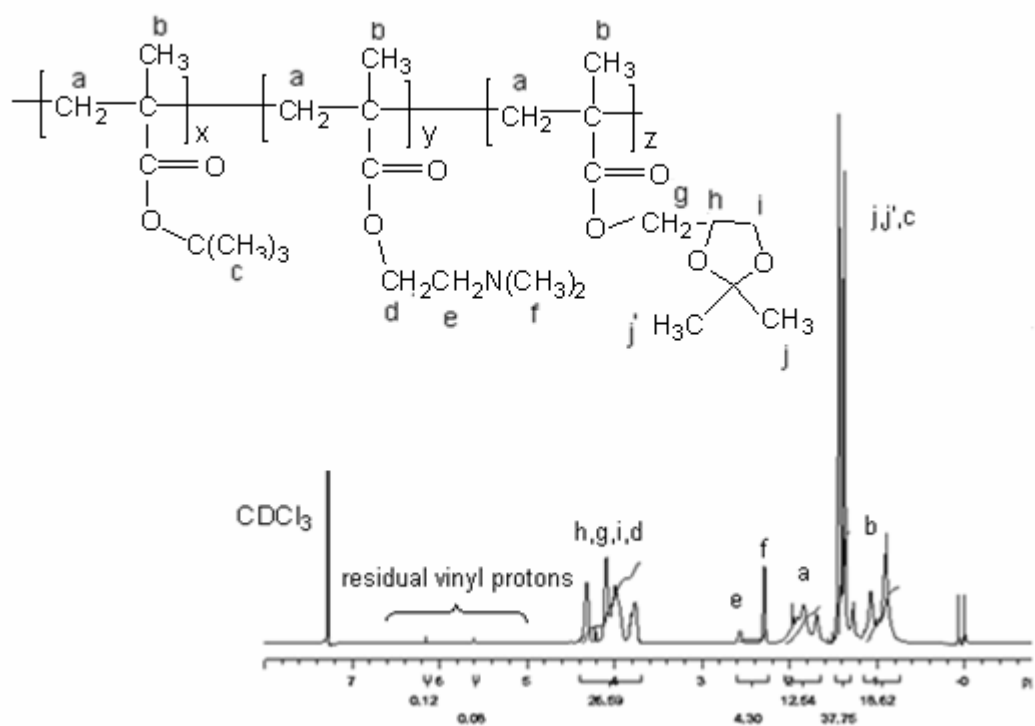

**Figure S1.**  $^1\text{H}$  NMR spectrum of terpolymer B1 in  $\text{CDCl}_3$ .

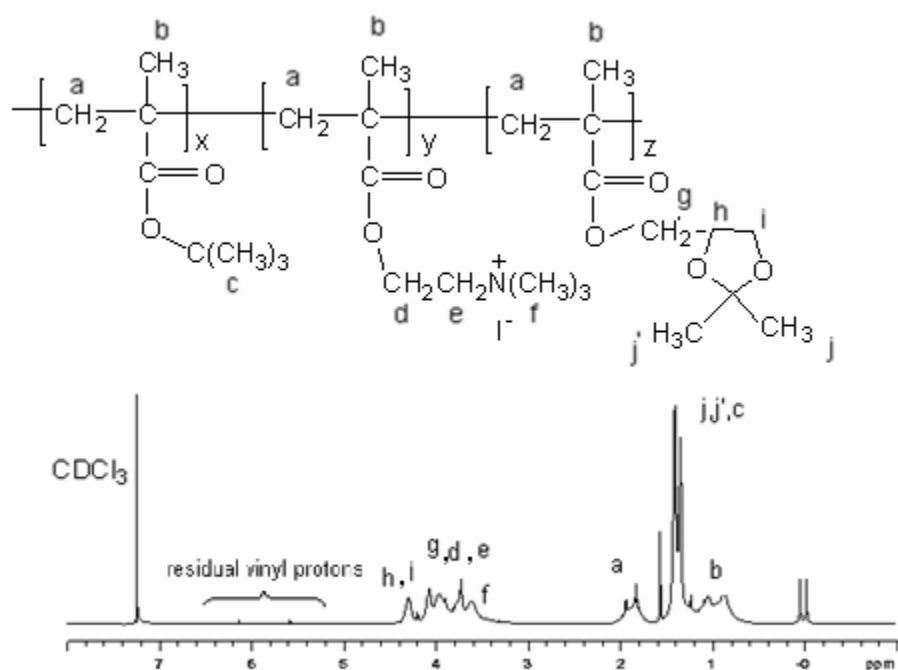

**Figure S2.**  $^1\text{H}$  NMR spectrum of quaternized polymer Q1-1 in  $\text{CDCl}_3$ .

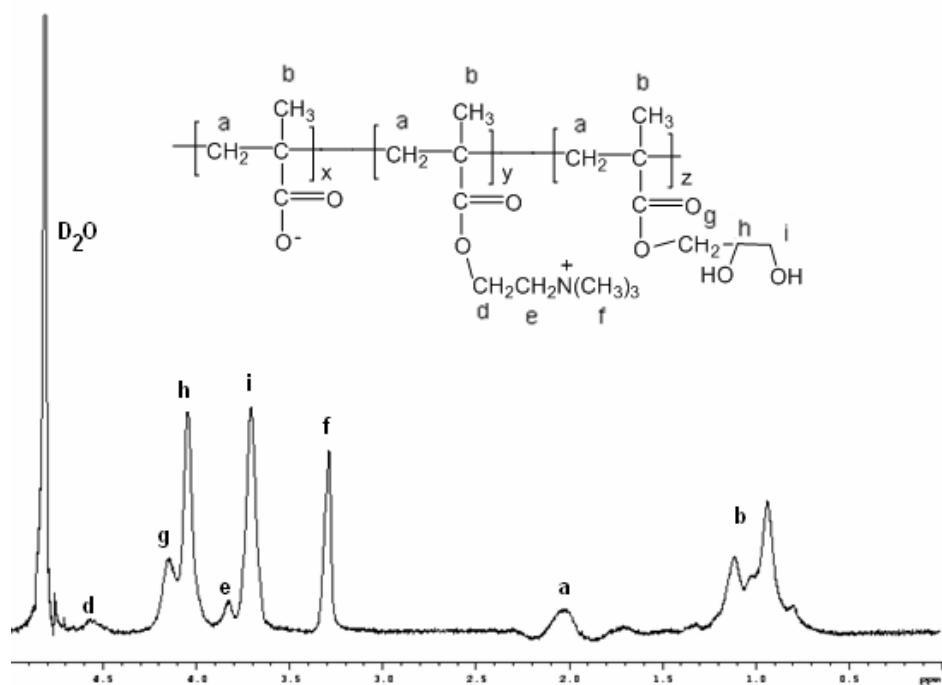

**Figure S3.**  $^1\text{H}$  NMR spectrum of polyampholyte PA1-1 in  $\text{D}_2\text{O}$ .

**Table S1. Quaternary Ammonium Ion Polymers**

| sample <sup>a</sup> | DP <sub>n</sub> | terpolymer<br>(g) | THF<br>(mL) | CH <sub>3</sub> I<br>(mmol) | DMAEMA <sup>b</sup><br>(mmol) | isolated<br>yield (g) <sup>c</sup> |
|---------------------|-----------------|-------------------|-------------|-----------------------------|-------------------------------|------------------------------------|
| Q1-1                | 368             | 1.00              | 15.0        | 320                         | 0.81                          | 1.16                               |
| Q1-2                | 368             | 1.76              | 15.0        | 320                         | 1.43                          | 1.90                               |
| Q2-1                | 225             | 3.00              | 10.0        | 580                         | 2.47                          | 3.35                               |
| Q2-2                | 225             | 2.36              | 10.0        | 580                         | 1.94                          | 2.55                               |
| Q4                  | 263             | 2.40              | 10.0        | 50                          | 3.88                          | 2.74                               |
| Q10                 | 1825            | 1.15              | 10.0        | 2.0                         | 0.85                          | 1.30                               |
| Q11                 | 1075            | 0.80              | 10.0        | 2.0                         | 1.10                          | 1.01                               |

<sup>a</sup>Two separate samples of terpolymers B1 and B2 were converted to polycations. <sup>b</sup>Calculated from % conversion of DMAEMA in terpolymer after partial conversion and moles of DMAEMA in the feed mixture. <sup>c</sup>The isolated yields are slightly high due to small amounts of THF in the samples, which were detected in the NMR spectra.

**Table S2. Synthesis of Polyampholytes**

| product | reactant <sup>a</sup> | solution <sup>b</sup> | yield |
|---------|-----------------------|-----------------------|-------|
|         | (g)                   | (mL)                  | (g)   |
| PA1-1   | 1.00                  | 10                    | 0.50  |
| PA1-2   | 1.76                  | 14                    | 0.89  |
| PA2-1   | 3.01                  | 24                    | 1.42  |
| PA2-2   | 2.50                  | 14                    | 1.53  |
| PA4     | 2.74                  | 16                    | 1.42  |
| PA10    | 1.49                  | 10                    | 1.05  |
| PA11    | 1.01                  | 6                     | 0.48  |

<sup>a</sup>Samples Q in Table S1. <sup>b</sup>1/1 concd aq HCl/1,4-dioxane.
